# Supplementary material
Source: PubMed Central journal article supplement (PMC2667380)
Supplement: NIHMS100450-supplement-supplement_1.pdf [file NIHMS100450-supplement-supplement_1.pdf]

## Supplemental Figure Legends

S1 (figure) **Domain organization of class I/II/IV HDACs from *C. elegans* (a), *Drosophila* (b) and *Danio rerio* (c).**

Deacetylase (DAC) domains, zinc fingers and other motifs are depicted as in Figure 1. GenBank accession numbers and genetic loci are listed in brackets at right. These deacetylases have not been as well characterized as their counterparts in yeast and mammals. While the five *D. melanogaster* proteins can be easily grouped according to their mammalian homologs, the eight *C. elegans* proteins are more complicated. ceHda-2 and ceHda-3 are more homologous to HDAC1 and HDAC2 than to HDAC3. Like ceHda-6 and ceHda-8, ceHda-4 and ceHda-5 may belong to class IIb since both are highly similar to the deacetylase domains of HDAC6 and HDAC10. For zebrafish, the HDAC7 sequence needs to be verified about the binding motifs for MEF2 and 14-3-3. The two clones listed for zebrafish HDAC9 could also be from separate genes, so further analysis is needed to address this. HDAC3l, HDAC3-like protein.

S2 (figure) **Sequence comparison of selective human HDACs with orthologues in sea urchin and zebrafish.**

**a.** Sequence alignment of human HDAC8 (hHDAC8) with its ortholog from the sea urchin *Strongylocentrotus purpuratus* (sHDAC8; GenBank accession number, XP\_791175.1). The conserved PKA site is underlined and the serine residues for phosphorylation are highlighted in red. **b.** Sequence comparison of human HDAC4 with a putative orthologue from the sea urchin *S. purpuratus* (GenBank accession number, XP\_797761.2). sHDAC4 refers to the protein from the latter organism. 14-3-3 and MEF2

binding sites are underlined with key residues highlighted in color. Also underlined are a Q-rich domain, important for dimerization, and a nuclear localization signal (NLS). The SP box is present in HDAC5 and HDAC9, but not in HDAC7. It is also conserved in class IIa HDACs from *C. elegans* and *D. melanogaster*. The leucine and isoleucine residues in the box resemble a nuclear export sequence, but expression of an HDAC4 fragment encompassing revealed that the box might not possess nuclear export activity<sup>1</sup>, suggesting that it may have another function. The arrow denotes the substitution of a catalytically important tyrosine residue by histidine in the human protein. This substitution occurs in zebrafish, but not in *C. elegans* or *D. melanogaster*, so it appears to be vertebrate-specific<sup>2</sup>. Note that an HDAC4-like protein from the sea squirt *Ciona intestinalis* (an invertebrate chordate) has a phenylalanine at the equivalent position<sup>2</sup>. **c** Sequence comparison of human HDAC10 (GenBank accession number, NP\_114408) with a putative ortholog from the zebrafish *D. rerio* (zHDAC10; GenBank accession number, NP\_956069.1). Two conserved motifs in the C-terminal extension are underlined and labeled with a hydrophobic (H) box and a question mark to denote their potential functional importance.

## References

1. Wang, A. H. & Yang, X. J. Histone deacetylase 4 possesses intrinsic nuclear import and export signals. *Mol. Cell. Biol.* **21**, 5992-6005 (2001).
2. Lamb, N. et al. Unraveling the hidden catalytic activity of vertebrate class IIa histone deacetylases. *Proc. Natl. Acad. Sci. USA* **104**, 17355-17340 (2007).

S3 (figure) **Crystal structures of the deacetylase domains of HDAC7 and HDAC8.**

**a** Ribbon diagram of the crystal structure of the HDAC7 deacetylase domain complexed with the inhibitor SAHA (suberoylanilide hydroxamic acid), with  $\alpha$ -helices and  $\beta$ -strands coloured in red and yellow, respectively. **b** Ribbon diagram of overall structure of the HDAC8 deacetylase domain with bound SAHA, with  $\alpha$ -helices and  $\beta$ -strands coloured in cyan and purple, respectively. **c** Ribbon diagram showing superposition of the HDAC7 HDAC8 structures. The PDB codes for the HDAC7 structure are 2NVR and 2PQO (Schuetz, A., Min, J.R., Allali-Hassani, A., Loppnau, P., Kwiatkowski, N.P., Mazitschek, R., Edwards, A.M., Arrowsmith, C.H., Vedadi, M., Bochkarev, A., and Plotnikov, A.N., data to be published), whereas the code for HDAC8 is 1T69. This figure was kindly provided by Drs. Xueyong Zhu and Ian A. Wilson (Scripps Research Institute).

**a** *C. elegans*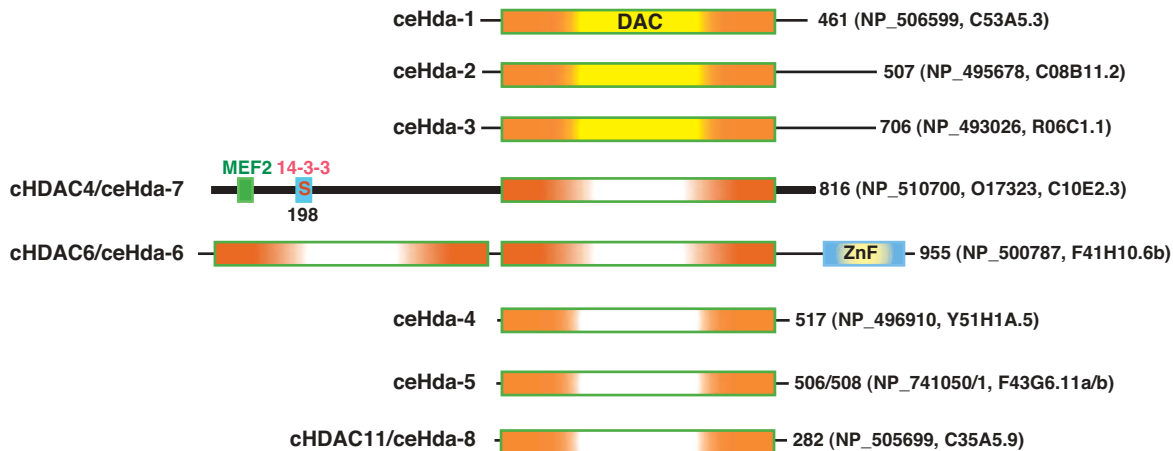**b** *Drosophila*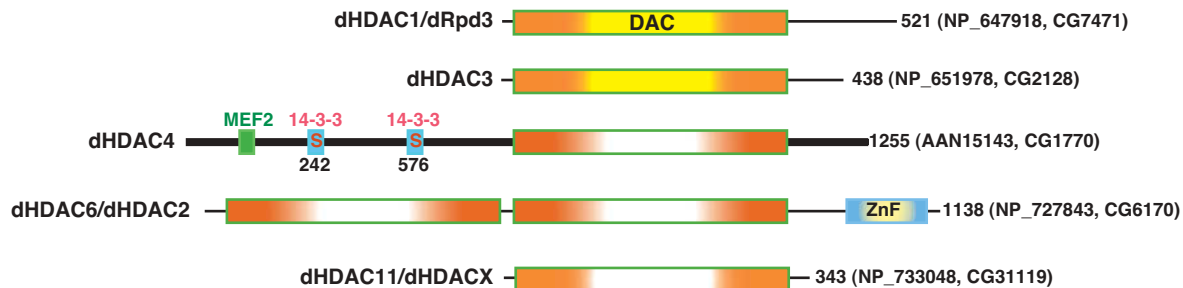

C *Danio rerio*

## Class I

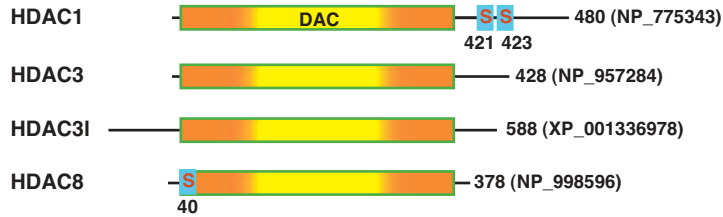

## Class II

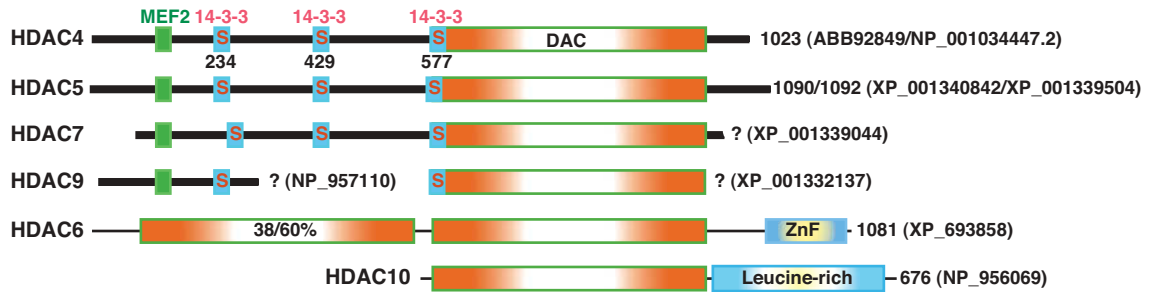

## Class IV

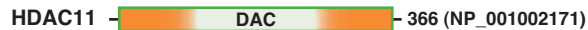

## Supplementary S2a (figure)

|        |     | PKA<br>↓                                                  |                                    |                            |
|--------|-----|-----------------------------------------------------------|------------------------------------|----------------------------|
| hHDAC8 | 18  | YIYSPEYVSMCDSLAKIPKRAS                                    | MVHSLIEAYALHKQMRIVKPKVASMEEMATFH   | TDAYLQ 77                  |
|        |     | Y+++ + + +CD + KIPKRAS                                    | MVH+LIEAY L + V P+ A+ +E+ TFH+ Y++ |                            |
| sHDAC8 | 293 | YVFNQKLLQLCDQVPKIPKRAS                                    | MVHTLIEAYDLLDHVTPVSP               | EFATKDELLTFHSQEQEYIE 352   |
|        |     | <u>Conservation motif</u>                                 |                                    |                            |
| hHDAC8 | 78  | HLQKVSQEGDDDDHPDSI--EYGLGYDC                              | PATEGIFDYAAAIGGATITAAQCLIDGMCKVAI  | 135                        |
|        |     | L++V+ E D + + + ++GLGYDCP+ ++D+ + GA+++ A+ LI C++AI       |                                    |                            |
| sHDAC8 | 353 | FLERNVLEEDSEKDEELKQQFGLGYDC                               | PSLPLVYDFVRLVAGASLS                | CAKALIQQKCRIAI 412         |
| hHDAC8 | 136 | NWSGGWHHAKKDEASGFCYLNDAV                                  | LGLRLRRKFERILYVDL                  | DLHHDGVEDAFSFTSKV 195      |
|        |     | NW+GGWHHA++DEA+GFCY+ND VL IL+L+ F R+LYVDL                 | DLHHDG V+DAF FT KV                 |                            |
| sHDAC8 | 413 | NWNGGWHHARDEAAGFCYVNDIVL                                  | LAILKLKEHFNRLYVDL                  | DLHHDGAVDDAFIFTPKV 472     |
| hHDAC8 | 196 | MTVSLHKFSPGFFPGTGDVSDV                                    | GLGKGRYYSVNVIQDGIQDEKYYQICESV      | LKEVYQAF 255               |
|        |     | MTVSLHKFSPGFFPGTG ++ VG G+G++Y+++VP++DGI+DE+Y + V+++V F   |                                    |                            |
| sHDAC8 | 473 | MTVSLHKFSPGFFPGTGS                                        | LNVRVGGGRGKFYTISVPLKDG             | IKDEQYSDLFTRVIEQVRVKF 532  |
| hHDAC8 | 256 | NPKAVVLQLGADTIAGDPMCSFN                                   | NMTPVGIGKCLKYILQWQLATLILGGGGYN     | LANTARCW 315               |
|        |     | P VV+Q GADT++ DPM SFN+TP+G+G+C+ +L W+L TL+LGGGGYN+ANTARCW |                                    |                            |
| sHDAC8 | 533 | QPSVVVVQCGADTLSSDPMQSF                                    | NLTPLVGQGCVSRVLSWKLPTLLLGGGGYN     | MANTARCW 592               |
| hHDAC8 | 316 | TYLTGVILGKTLSSIEIPDHEFF                                   | TAYGPDYVLEITPSCR                   | PDRNEPHRIQQILNYIKGNLKH 375 |
|        |     | +YLTG++LG+ L SEIPDHEFF YGP Y LE+ P+ + N ++ + I NL++       |                                    |                            |
| sHDAC8 | 593 | SYLTGLVLGQKLPSEIPDHEFF                                    | LEYGPGYQLEVCPAHY                   | TNYNTVEYMETVAKAITKNLEN 652 |
| hHDAC8 | 376 | V 376                                                     |                                    |                            |
|        |     | V                                                         |                                    |                            |
| sHDAC8 | 653 | V 653                                                     |                                    |                            |

## Supplementary S2b (figure)

|        |     |                                                                                         |     |
|--------|-----|-----------------------------------------------------------------------------------------|-----|
| HDAC4  | 90  | IAEFQRQHEQLSRQHEAQLHEHIKQQQEMLAMKHQQ--ELLEHQKLERHRQEQELEKQH                             | 147 |
|        |     | +A+F+ + QL +QH+ KQQQE++ ++H Q +LLE QR LE +Q+Q+ ++Q                                      |     |
| sHDAC4 | 96  | LAQFKERQAQLVKQHQ-----KQQQELIMVRHVQREQLLEQQRLLLEAQQQQQQ--QQQQ                            | 147 |
|        |     | Q-rich domain                                                                           |     |
| HDAC4  | 148 | REQKLQQLKNKEKGKESAVASTEVMKQLQEFVLNKKKALAHN---LNHCISSDPRYWYG                             | 204 |
|        |     | ++ + Q L+ K+SA ASTEVK KLQ+F+LN+++ + LNH S R+W                                           |     |
| sHDAC4 | 148 | QQAQKQHLEQLLAKKQSANASTEVDKQLQKFLLNROQRTDYGGSGPLNH--SPPYRHW--                            | 203 |
|        |     | MEF2 binding                                                                            |     |
| HDAC4  | 205 | KTQHSSSLQSSPPQSGVSTSYNHPVLGM--YDAKDDFPLRKTASEPNLKLRSRLKQKVAE                            | 262 |
|        |     | T SS+D SPP + VS ++H +G YD+ + FPLRKTAS+ NLK+RSRLK+KV E                                   |     |
| sHDAC4 | 204 | -TPPSSMDHHSPPHN-VSPQFHHQPMGFQYDSSN-FPLRKTASDSNLKVRSLKKEKVTE                             | 260 |
|        |     | 14-3-3 binding 1                                                                        | NLS |
| HDAC4  | 263 | RRS--SPLLRRKDGPPVVTALKKRPLDVTDSACSSAPGSPSPNNSSGVSVAENGIAPAV                             | 320 |
|        |     | RR+ SPLLRR++GP +LK++P+ T S + G ++G + NG+ +V                                             |     |
| sHDAC4 | 261 | RRTHGSPLLRRREGP--NSLKRKPIIDTSSNSAPGSGPSSPLSAGAAGGGDSPNGL--SV                            | 316 |
|        |     | NLS                                                                                     |     |
| HDAC4  | 321 | PSIPAETSLAHLVAREGSAAPL-PLYTSPSLPNITLGLPATGPSAGTAGQDTERLTLP                              | 379 |
|        |     | ++P E S A +++ ++ + LY+SPSLPNI++G+PA A P                                                 |     |
| sHDAC4 | 317 | AALPEEASSATKMMLKQRLYGVVNDLYSSPSLPNISIGIPA----ANNPQHSPLGQVKP                             | 372 |
|        |     | SP box                                                                                  |     |
| HDAC4  | 380 | ALQQRSLFPGTHLTPYLSTSPLELDG-GAAHSPLLQHMVLEQPPAQAPLVTGLGALPL                              | 438 |
|        |     | L S+ L PYL +PL G AH L M + AQ ++                                                         |     |
| sHDAC4 | 373 | GL-PTASMLGAAPLNPYLPGAPLSLAGINPAH---LACMTFQDFQQAQTAAMSA-----                             | 422 |
| HDAC4  | 439 | HAQSLVGADRVSPSIHKLRQHRPLGRTO <sup>S</sup> APLPQN 473                                    |     |
|        |     | + +G + P + HRPL RT <sup>S</sup> APLP N                                                  |     |
| sHDAC4 | 423 | ---AQIG---IHPKPIRPVTHRPLV <sup>R</sup> TH <sup>S</sup> APLPNN 451                       |     |
|        |     | 14-3-3 binding 2                                                                        |     |
| HDAC4  | 621 | FGGHRPL <sup>S</sup> RAQ <sup>S</sup> SPASATFP-VSVQPEP-----TKPRFTTGLVYDTLMLKHQCCTCGSSSS | 674 |
|        |     | FGGHRPL R +SSPA+A P +S+ TK FTTGL YDTLMLKHQC CG++ +                                      |     |
| sHDAC4 | 585 | FGGHRPL <sup>M</sup> RV <sup>R</sup> SSPAAAGIPSLSLNHHHHDHNRKHTFTTGLAYDTLMLKHQCQCQGNQON  | 644 |
|        |     | 14-3-3 binding 3                                                                        |     |
| HDAC4  | 675 | HPEHAGRIQSIWSRLQETGLRGKCECIRGRKATLEELQTVHSEHTLLYGTNPLNRQKLD                             | 734 |
|        |     | HPEH GR+QSIW+RL E G+ +CE IR RKA+LEELQ+ HSE +TL +GT+ ++ KLD                              |     |
| sHDAC4 | 645 | HPEHPGRLQSIWARLHERGIVSRCEIRTRKASLEELQSCHSEGYTLFFGTSQTHKAKLD                             | 704 |
| HDAC4  | 735 | SKKLLGSLASVVFVRLPCGGVGVDSDTIWNNEVHSAGAARLAVGCVVELVFKVATGELKNGF                          | 794 |
|        |     | S+KL F L CGG+GVD+DT+W+++ S GA R+A G V+EL FKVATGELKNGF                                   |     |
| sHDAC4 | 705 | SRKLALIPKLNFTWLSCGGLGVDTDVWHDIQSPGAVRIAAGAVIELAFKVATGELKNGF                             | 764 |
| HDAC4  | 795 | AVVRPPGHHAESTPMGFICYFNSVAVAAKLLQQRLSVSKILIVDWDVHHGNGTQQAFYS                             | 854 |
|        |     | A+VRPPGHHAES MGFC+FNS+A+AAK L+ +L ++KILI+DWDVHHGN TQ+ FY D                              |     |
| sHDAC4 | 765 | AIVRPPGHHAETSQAMGFCFFNSIAIAAKQLRLKLNKILIIDWDVHHGNSTQKIFYED                              | 824 |
| HDAC4  | 855 | PSVLYMSLHRYDDGNFFPGSGAPDEVTGPGVGFNVNMAFTGGLDPPMGDAEYLAARFRTV                            | 914 |
|        |     | P VLY+SLHR+D+GNFFPG+GAPDE G G G+G+NVN+AF GGL+PPMGDAEY+AAFR++                            |     |
| sHDAC4 | 825 | PHVLYISLHRHDNGNFFPGTAPDES <sup>G</sup> CGAGLGYNVNIAFHGGLNPPMGDAEYIAAFRSI                | 884 |
| HDAC4  | 915 | VMPIASEFAPDVVLVSSGFDAVEGHPTPLGGYNLSARCFGYLTKQLMGLAGGRIVLALEG                            | 974 |
|        |     | V+PIA EF+PDVVLVSSGFDA GHP PLGGY ++ CF Y+T+++MGLA GR+VLALEG                              |     |
| sHDAC4 | 885 | VLPIAREFSPDVVLVSSGFDAANGHPNPLGGYKVT <sup>P</sup> ACFSYMRKVMGLANGRVVLALEG                | 944 |
| HDAC4  | 975 | G <sup>H</sup> DLTAICDASEACVSALLGNELDPLPEKVLQORPNANAVRSMEKVMIEHS 1025                   |     |
|        |     | G+DLTAICDASE C LLG++ PL E + PNANAV + + +EI S                                            |     |
| sHDAC4 | 945 | G <sup>Y</sup> DLTAICDASEVCAQTLLGDDPSPLSEDAINGVPNANAVECLRRRTIEIQS 995                   |     |

N-terminal extension

Deacetylase domain

↑  
Key tyrosine

Supplementary S2c (figure)

|         |     |                                                              |     |                    |                      |
|---------|-----|--------------------------------------------------------------|-----|--------------------|----------------------|
| HDAC10  | 2   | GTALVYHEDMTATRLLWDDPECEIERPERLTAALDRLRQRCLEQRCLRLSAREASEEELG | 61  | Deacetylase domain |                      |
| zHDAC10 | 4   | G+AL++ E+M+ +LLW DP CEIE PERLT + + LR GL QRC + R+A+E+E+      | 63  |                    |                      |
| HDAC10  | 62  | LVSPEYVSLVRETVLQVGLKEELQALSQGFDAIYFHPSTFHARLAAGAGLQLVDAVLTGA | 121 |                    |                      |
| zHDAC10 | 64  | L HS EY+ V++T + EEL A S +++ +YFH + +HCA+LAAGA LQLVD+V+       | 123 |                    |                      |
| HDAC10  | 122 | VQNGLALVRPPGHGQRAAANGFCVFNVAIAAAHAKQKHGLHRILVVDVHGGQGIQY     | 181 |                    |                      |
| zHDAC10 | 124 | V+NG+ALVRPPGHH QR+AAANGFCVFNVA AA +AK+ + L+RIL+VDVDVHGGQGIQY | 183 |                    |                      |
| HDAC10  | 182 | LFEDDPSVLYFSWHRYEHRFPFLRESADAVGRGQGLGFTVNLPNVQVGMGNADYVAA    | 241 |                    |                      |
| zHDAC10 | 184 | FE+DPSVLYFSWHRYEH FWP L ESD +VG+G+G GF +NLPWN+VGM N+DY+AA    | 243 |                    |                      |
| HDAC10  | 242 | FLHLLPLAFEDPELVLSAGFDSAIGDPEGQMQTPECF AHLTQLQLVLAGGRVCAVL    | 301 |                    |                      |
| zHDAC10 | 244 | F H+LLP+A+EFDPPELV+VSAGFDSAIGDPEG+M A PE FAHLT LL LA G++C VL | 303 |                    |                      |
| HDAC10  | 302 | EGGYHLESLAESVCMTVQTLLGDPAPPLSGPMAPCSALESIQSARAAQAPHW---KSLQ  | 358 |                    |                      |
| zHDAC10 | 304 | EGGY+L SL +SVC TV +LLGDP P +SG C SALESIQ+ R Q+ +W K L        | 363 |                    |                      |
| HDAC10  | 359 | QQDVTAVPMSPSSHSPEGRPPPLPGGPVCKAAASAPSSLLDQPCPCPAPSVRTAVALTT  | 418 |                    |                      |
| zHDAC10 | 364 | Q + P P + G P +A + +P SVRT V +                               | 420 |                    |                      |
| HDAC10  | 419 | PDITLVLPDVIQOEASALREETEAWARPHESLAREEALTALGKLLYLLDGMLDGQVNSG  | 478 |                    | C-terminal extension |
| zHDAC10 | 421 | P + L LP + Q + + E T + + + ++                                | 478 |                    |                      |
| HDAC10  | 479 | IAATPASAAAATLDVAVRRGLSHG----AQRLLCVALGQLDRPPDLAHDGRSLWLNIRGK | 534 |                    |                      |
| zHDAC10 | 479 | + L V+V+ L H A+R+L V +G + P +DG+ + I K                       | 537 |                    |                      |
| HDAC10  | 535 | EAAALSMFHVSTPL---PVMTGGFLSCILGLVLPLAYGFQPDVL-VALGPGHGLQGPHA  | 590 |                    |                      |
| zHDAC10 | 538 | E + ++ L +T GF+ +LGL+LP+AY F P LVL + +                       | 597 |                    |                      |
| HDAC10  | 591 | ETEDKCVNRLTLCLREGESLTAGFMQALLGLILPVAYEFNPALVLGIVEETAAKTRLMRV | 650 |                    |                      |
| zHDAC10 | 598 | <b>H box</b><br>L + L + L + L+G + LGP PEDV+ +                | 657 |                    |                      |
| HDAC10  | 651 | RGQLEPQWKMLQC 663                                            |     |                    |                      |
| zHDAC10 | 658 | R +L+ +W +L+C<br>RQRLQERWGLLRC 670                           |     |                    |                      |

?



**a HDAC7**

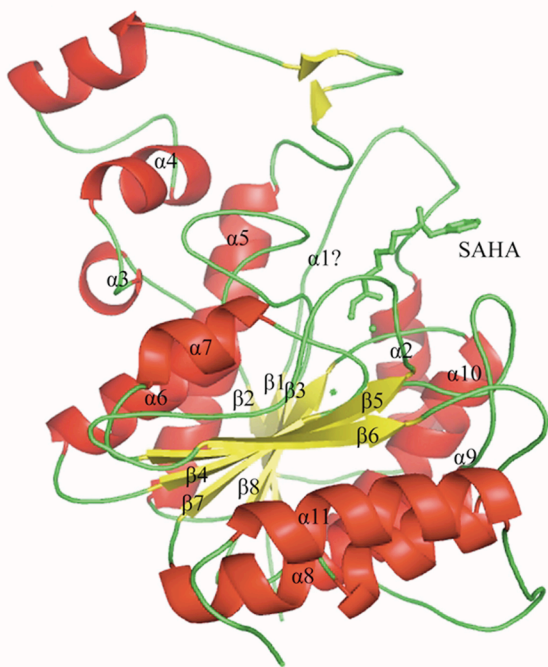

**b HDAC8**

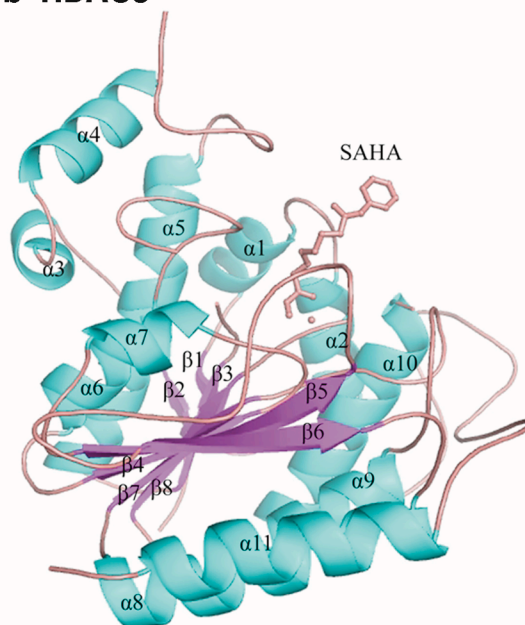

**c Overlay**

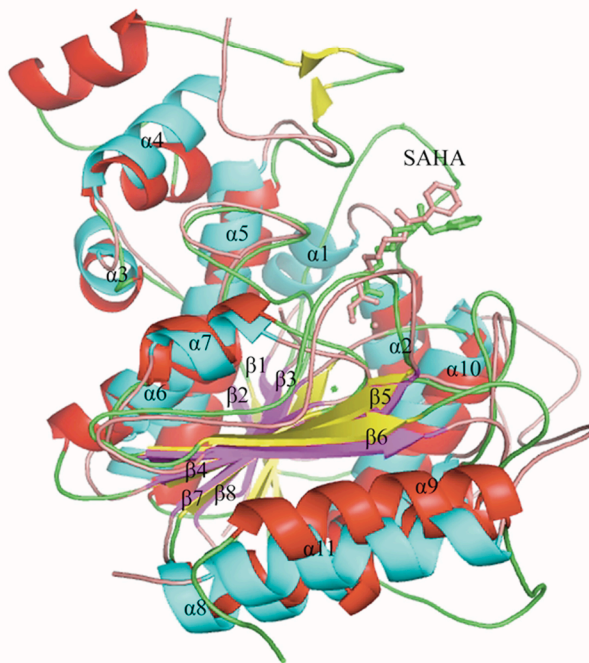

**Supplementary S4 (table) Purification of class I/II HDAC complexes from yeast**

|                                              |                        |                                                                                                                                                   |                                                                                                                                                 |                                                                                                                                                                               |                                                                                                                                                                             |
|----------------------------------------------|------------------------|---------------------------------------------------------------------------------------------------------------------------------------------------|-------------------------------------------------------------------------------------------------------------------------------------------------|-------------------------------------------------------------------------------------------------------------------------------------------------------------------------------|-----------------------------------------------------------------------------------------------------------------------------------------------------------------------------|
| <i>S. cerevisiae</i><br>Rpd3<br>complexes    | Purification<br>method | Conventional<br>chromatography<br>followed by tandem<br>affinity with yeast<br>cell extract<br>expressing Rpd3-<br>TAP or Sin3-TAP <sup>1,2</sup> | Conventional<br>chromatography<br>followed by tandem<br>affinity with yeast<br>cell extract<br>expressing Rpd3-<br>TAP or Sin3-TAP <sup>2</sup> | Tandem affinity<br>with yeast cell<br>extract expressing<br>Sin3-TAP, Rpd3-<br>TAP, Ume1-TAP,<br>Rco1-TAP, Eaf3-<br>TAP, Rxt1-TAP,<br>Pho23-TAP, or<br>Sap30-TAP <sup>3</sup> | Tandem affinity with<br>yeast cell extract<br>expressing Sin3-<br>TAP, Rpd3-TAP,<br>Ume1-TAP, Rco1-<br>TAP, Eaf3-TAP,<br>Rxt1-TAP, Pho23-<br>TAP, or Sap30-TAP <sup>3</sup> |
|                                              | Proteins<br>identified | Rpd3L: Rpd3, Sin3,<br>Ume1, Pho23,<br>Sap30, Sds3, Cti6,<br>Rxt2, Rxt3, Dep1,<br>Ume6, Ash1                                                       | Rpd3S: Rpd3, Sin3,<br>Ume1, <b>Rco1</b> , <b>Eaf3</b>                                                                                           | Rpd3C(L): Rpd3,<br>Sin3, Ume1, Rxt1,<br>Rxt2, Dep1, Sds3,<br><b>Pho23</b> , Sap30                                                                                             | Rpd3C(S): Rpd3,<br>Sin3, Ume1, <b>Rco1</b> ,<br><b>Eaf3</b>                                                                                                                 |
| <i>S. pombe</i> Clr6<br>complexes            | Purification<br>method | Anti-HA<br>immunoaffinity with<br>yeast cell extract<br>expressing Clr6-HA<br>or Pst1-HA followed<br>by glycerol gradient <sup>4</sup>            | Anti-HA<br>immunoaffinity with<br>yeast cell extract<br>expressing Clr6-HA<br>or Pst1-HA followed<br>by glycerol gradient <sup>4</sup>          |                                                                                                                                                                               |                                                                                                                                                                             |
|                                              | Proteins<br>identified | Complex I: Pst1,<br>Sds3, Clr6, Prw1<br>Complex I': Pst1,<br>Sds3, <b>Png2</b> , Clr6,<br>Prw1                                                    | Complex II: Pst 2,<br><b>Cph1</b> , <b>Cph2</b> , Alp13,<br>Clr6, Prw1                                                                          |                                                                                                                                                                               |                                                                                                                                                                             |
| <i>S. cerevisiae</i><br>Hda1 complex         | Purification<br>method | Conventional<br>chromatography of<br>yeast extract <sup>5</sup>                                                                                   |                                                                                                                                                 |                                                                                                                                                                               |                                                                                                                                                                             |
|                                              | Proteins<br>identified | Hda1, Hda2, Hda3                                                                                                                                  |                                                                                                                                                 |                                                                                                                                                                               |                                                                                                                                                                             |
| <i>S. pombe</i> Clr3<br>complex              | Purification<br>method | Anti-Flag<br>immunoaffinity with<br>yeast cell extract<br>expressing Clr3-<br>Flag <sup>6</sup>                                                   |                                                                                                                                                 |                                                                                                                                                                               |                                                                                                                                                                             |
|                                              | Proteins<br>identified | <b>Mit1</b> , Clr1, ccq1,<br>Clr3, Clr2                                                                                                           |                                                                                                                                                 |                                                                                                                                                                               |                                                                                                                                                                             |
| <i>S. cerevisiae</i><br>Hos2-Set3<br>complex | Purification<br>method | Tandem affinity<br>with yeast cell<br>extract expressing<br>Set3-TAP or Hos2-<br>TAP <sup>7</sup>                                                 |                                                                                                                                                 |                                                                                                                                                                               |                                                                                                                                                                             |
|                                              | Proteins<br>identified | Snt1, YIL112, <b>Set3</b> ,<br>SIF2, Hos2, <b>Hst1</b> ,<br>Cpr1,                                                                                 |                                                                                                                                                 |                                                                                                                                                                               |                                                                                                                                                                             |

Note: The identified proteins in boldface denote subunits with domains (such as chromodomain and PHD finger) and enzymatic activities (such as ATPase, sirtuin and histone methyltransferase) for crosstalk with other chromatin-regulating processes.

## References

1. Carrozza, M.J. et al. Stable incorporation of sequence specific repressors Ash1 and Ume6 into the Rpd3L complex. *Biochim. Biophys. Acta* **1731**, 77-87 (2005).
2. Carrozza, M.J. et al. Histone H3 methylation by Set2 directs deacetylation of coding regions by Rpd3S to suppress spurious intragenic transcription. *Cell* **123**, 581-592 (2005).
3. Keogh, M.C. et al. Cotranscriptional set2 methylation of histone H3 lysine 36 recruits a repressive Rpd3 complex. *Cell* **123**, 593-605 (2005).
4. Nicolas, E. et al. Distinct roles of HDAC complexes in promoter silencing, antisense suppression and DNA damage protection. *Nat. Struct. Mol. Biol.* **14**, 372-380 (2007).
5. Wu, J., Carmen, A.A., Kobayashi, R., Suka, N. & Grunstein, M. HDA2 and HDA3 are related proteins that interact with and are essential for the activity of the yeast histone deacetylase HDA1. *Proc. Natl. Acad. Sci. USA* **98**, 4391-4396 (2001).
6. Sugiyama, T. et al. SHREC, an effector complex for heterochromatic transcriptional silencing. *Cell* **128**, 491-504 (2007).
7. Pijnappel, W.W. et al. The *S. cerevisiae* SET3 complex includes two histone deacetylases, Hos2 and Hst1, and is a meiotic-specific repressor of the sporulation gene program. *Genes Dev.* **15**, 2991-3004 (2001).

**Supplementary S5 (table) Purification of class I HDAC complexes from *Xenopus* and mammals**

|                |                   |                     |                                                                                                  |                                                                                                                                                   |                                                                                                          |                                                                                                                                                        |                                                                                                                                                                     |                                                                                                                          |
|----------------|-------------------|---------------------|--------------------------------------------------------------------------------------------------|---------------------------------------------------------------------------------------------------------------------------------------------------|----------------------------------------------------------------------------------------------------------|--------------------------------------------------------------------------------------------------------------------------------------------------------|---------------------------------------------------------------------------------------------------------------------------------------------------------------------|--------------------------------------------------------------------------------------------------------------------------|
| <b>HDAC1/2</b> | Sin3 complex      | Purification method | Anti-mSin3 immunoaffinity with HeLa nuclear extract <sup>1,2</sup>                               | Anti-HDAC1 immunoaffinity followed by anti-mSin3A with U937 nuclear extract <sup>3</sup>                                                          | Anti-SAP30 immunoaffinity with HeLa nuclear extract <sup>4</sup>                                         | Anti-mSin3A immunoaffinity with K562 nuclear extract <sup>5</sup>                                                                                      | Anti-ING1 or TAP-ING2 immunoaffinity with HeLa nuclear extract or anti-Flag with nuclear extract from H1299 cells expressing Flag-p33 <sup>ING1b</sup> (refs. 6, 7) | Anti-Flag immunoaffinity with nuclear extract from H1299 cells expressing Flag-p33 <sup>ING1b</sup> or Flag-p40 (ref. 8) |
|                |                   | Proteins identified | mSin3, HDAC1/2, RbAp46/48, SAP30, SAP18                                                          | mSin3A, p72, HDAC1/2, RbAp48, p45, p33                                                                                                            | Sin3, HDAC1/2, RbAp46/48, (p33), ING1, SAP30                                                             | SAP180/RBP1, Sin3A, SAP130, HDAC1/2, RbAp46/48, SDS3, SAP38/ING1, SAP30, SAP28                                                                         | RBP1, RBP1-like (SAP180), SAP130, Sin3A, HDAC1/2, RbAp46/48, p42/SDS3, BRMS1 ING1/p33 <sup>ING1b</sup> , SAP30                                                      | RBP1, Sin3A, HDAC1/2, RbAp46/48, p40, p33 <sup>ING1b</sup> , SAP30                                                       |
|                | NuRD/Mi-2 complex | Purification method | Anti-Mi2 immunoaffinity or conventional chromatography with HeLa nuclear extract <sup>9,10</sup> | Conventional chromatography with <i>Xenopus</i> egg extract <sup>11,12</sup>                                                                      | Anti-CHD4 immunoaffinity with SW13 nuclear extract <sup>13</sup>                                         | Anti-HDAC2 immunoprecipitation with HeLa cell extract <sup>14</sup>                                                                                    | Tandem affinity with extract from HEK293 cells expressing MBD2-TAP or MBD3-TAP <sup>15</sup>                                                                        | Conventional chromatography with HeLa nuclear extract <sup>16</sup>                                                      |
|                |                   | Proteins identified | Mi2, MTA2, HDAC1/2, RbAP46/48, MBD3                                                              | Mi2, MTA-1 like, p66, xRPD3, RbAP46/48, MBD3                                                                                                      | CHD4/CHD3, N190, N170, N160, N140, N135, N130, N85, N75, N70, N68, N66, HDAC1/2, N61, RbAP46/48 N38, N34 | Mi2, p110, p70, HDAC1/2, RbAp48                                                                                                                        | Mi2, MTA1/2/3, p66, HDAC1/2, RbAP46/48, MBD2/3                                                                                                                      | Mi2, MTA2, p66/68, HDAC1/2, RbAP46/48, MBD2/3                                                                            |
|                | CoREST complex    | Purification method | Anti-CoREST immunoaffinity with HeLa cell extract <sup>17</sup>                                  | Anti-Flag immunoaffinity followed by glycerol density gradient sedimentation with nuclear extract from HeLa cells expressing Flag-HDAC1 (ref. 18) | Anti-Flag immunoaffinity with nuclear extract from HEK293 cells expressing Flag-BHC110 (refs 19, 20)     | Conventional chromatography with HeLa nuclear extract or anti-Flag immunoaffinity with nuclear extract from 293 cells expressing Flag-BRAF35 (ref. 21) | Anti-Flag/anti-HA immunoaffinity followed by glycerol density gradient sedimentation with nuclear extract from HeLa cells expressing Flag-HA-CtBP <sup>22</sup>     |                                                                                                                          |

|              |                    |                     |                                                                                   |                                                                                               |                                                                                                                                           |                                                                                             |                                                                       |  |
|--------------|--------------------|---------------------|-----------------------------------------------------------------------------------|-----------------------------------------------------------------------------------------------|-------------------------------------------------------------------------------------------------------------------------------------------|---------------------------------------------------------------------------------------------|-----------------------------------------------------------------------|--|
|              |                    | Proteins identified | p110b, Znf217, p80, CoREST, HDAC1/2, Sox-like                                     | KIAA0601, CoREST, HDAC1, p37                                                                  | X-FIM, FIM, ZnF516, KIAA0182, ZnF217, BHC110, BHC80, CoREST, HDAC1/2, CtBP, BRAF35                                                        | BHC110, BHC80, CoREST, HDAC1/2, BRAF35                                                      | CtBP1, CtBP2, EuHMT, G9a, ZEB1, HDAC1/2, LSD1 (NPAO/KIAA0601), CoREST |  |
| <b>HDAC3</b> | N-CoR/SMRT complex | Purification method | Anti-HDAC3 immunoaffinity with HeLa cell extract <sup>23-25</sup>                 | Anti-Flag immunoaffinity with nuclear extract from HeLa cells expressing Flag-HDAC3 (ref. 26) | Anti-SMRT immunoaffinity with HeLa nuclear extract or anti-Flag with nuclear extract from 293T cells expressing Flag-HDAC3 (refs. 27, 28) | Anti-N-CoR immunoaffinity with HeLa nuclear extract <sup>25, 29, 30</sup>                   |                                                                       |  |
|              |                    | Proteins identified | N-CoR/SMRT, TFII-I, PP4 <sub>R1</sub> , TBL1/TBLR1, HDAC3, GPS2, PP4 <sub>C</sub> | N-CoR/SMRT, TBL1/TBLR1, HDAC3, GPS2                                                           | N-CoR/SMRT, AKAP95, HA95, TBL1, HDAC3, GPS2                                                                                               | N-CoR, TIF1 $\beta$ , JMJD2A (KIAA0677), HsEg5, Kaiso, hsp70, IR10, TBL1/TBLR1, HDAC3, GPS2 |                                                                       |  |

Note: In sub-stoichiometric amounts, HDAC1 and HDAC2 are also known to be present in many other complexes, e.g. SWI/SNF complexes<sup>31, 32</sup>, PRP4 kinase complex<sup>33</sup>, and the SMCx demethylase complex important for X-linked mental retardation<sup>34</sup>. For clarity and simplicity, association of HDACs with numerous transcription factors is not listed and discussed here.

## References

1. Zhang, Y., Iratni, R., Erdjument-Bromage, H., Tempst, P. & Reinberg, D. Histone deacetylases and SAP18, a novel polypeptide, are components of a human Sin3 complex. *Cell* **89**, 357-364 (1997).
2. Zhang, Y. et al. SAP30, a novel protein conserved between human and yeast, is a component of a histone deacetylase complex. *Mol. Cell* **1**, 1021-1031 (1998).
3. Hassig, C.A., Fleischer, T.C., Billin, A.N., Schreiber, S.L. & Ayer, D.E. Histone deacetylase activity is required for full transcriptional repression by mSin3A. *Cell* **89**, 341-347 (1997).
4. Kuzmichev, A., Zhang, Y., Erdjument-Bromage, H., Tempst, P. & Reinberg, D. Role of the Sin3-histone deacetylase complex in growth regulation by the candidate tumor suppressor p33(ING1). *Mol. Cell. Biol.* **22**, 835-848 (2002).
5. Fleischer, T.C., Yun, U.J. & Ayer, D.E. Identification and characterization of three new components of the mSin3A corepressor complex. *Mol. Cell. Biol.* **23**, 3456-3467 (2003).
6. Skowyra, D. et al. Differential association of products of alternative transcripts of the candidate tumor suppressor ING1 with the mSin3/HDAC1 transcriptional corepressor complex. *J. Biol. Chem.* **276**, 8734-8739 (2001).
7. Doyon, Y. et al. ING tumor suppressor proteins are critical regulators of chromatin acetylation required for genome expression and perpetuation. *Mol. Cell* **21**, 51-64 (2006).
8. Nikolaev, A.Y., Papanikolaou, N.A., Li, M., Qin, J. & Gu, W. Identification of a novel BRMS1-homologue protein p40 as a component of the mSin3A/p33(ING1b)/HDAC1 deacetylase complex. *Biochem. Biophys. Res. Commun.* **323**, 1216-1222 (2004).
9. Zhang, Y., LeRoy, G., Seelig, H.P., Lane, W.S. & Reinberg, D. The dermatomyositis-specific autoantigen Mi2 is a component of a complex containing histone deacetylase and nucleosome remodeling activities. *Cell* **95**, 279-289 (1998).
10. Zhang, Y. et al. Analysis of the NuRD subunits reveals a histone deacetylase core complex and a connection with DNA methylation. *Genes Dev.* **13**, 1924-1935 (1999).
11. Wade, P.A. et al. Mi-2 complex couples DNA methylation to chromatin remodelling and histone deacetylation. *Nat. Genet.* **23**, 62-66 (1999).
12. Wade, P.A., Jones, P.L., Vermaak, D. & Wolffe, A.P. A multiple subunit Mi-2 histone deacetylase from *Xenopus laevis* cofractionates with an associated Snf2 superfamily ATPase. *Curr. Biol.* **8**, 843-846 (1998).
13. Xue, Y. et al. NURD, a novel complex with both ATP-dependent chromatin-remodeling and histone deacetylase activities. *Mol. Cell* **2**, 851-861 (1998).
14. Tong, J.K., Hassig, C.A., Schnitzler, G.R., Kingston, R.E. & Schreiber, S.L. Chromatin deacetylation by an ATP-dependent nucleosome remodeling complex. *Nature* **395**, 917-921.
15. Guezennec, X.L. et al. MBD2/NuRD and MBD3/NuRD, two distinct complexes with different biochemical and functional properties. *Mol. Cell. Biol.* **26**, 843-851.
16. Feng, Q. & Zhang, Y. The MeCP1 complex represses transcription through preferential binding, remodeling, and deacetylating methylated nucleosomes. *Genes Dev.* **15**, 827-832.

17. You, A., Tong, J.K., Grozinger, C.M. & Schreiber, S.L. CoREST is an integral component of the CoREST- human histone deacetylase complex. *Proc. Natl. Acad. Sci. USA* **98**, 1454-1458 (2001).
18. Humphrey, G.W. et al. Stable histone deacetylase complexes distinguished by the presence of SANT domain proteins CoREST/kiaa0071 and Mta-L1. *J. Biol. Chem.* **276**, 6817-6824 (2001).
19. Lee, M.G., Wynder, C., Cooch, N. & Shiekhatar, R. An essential role for CoREST in nucleosomal histone 3 lysine 4 demethylation. *Nature* **437**, 432-435 (2005).
20. Lee, M.G. et al. Functional interplay between histone demethylase and deacetylase enzymes. *Mol. Cell. Biol.* **26**, 6395-6402 (2006).
21. Hakimi, M.A. et al. A core-BRAF35 complex containing histone deacetylase mediates repression of neuronal-specific genes. *Proc. Natl. Acad. Sci. USA* **99**, 7420-7425 (2002).
22. Shi, Y. et al. Coordinated histone modifications mediated by a CtBP co-repressor complex. *Nature* **422**, 735-738 (2003).
23. Wen, Y.D., Cress, W.D., Roy, A.L. & Seto, E. Histone deacetylase 3 binds to and regulates the multifunctional transcription factor TFII-I. *J. Biol. Chem.* **278**, 1841-1847 (2003).
24. Wen, Y.D. et al. The histone deacetylase-3 complex contains nuclear receptor corepressors. *Proc. Natl. Acad. Sci. USA* **97**, 7202-7207 (2000).
25. Zhang, D., Yoon, H.G. & Wong, J. JMJD2A is a novel N-CoR-interacting protein and is involved in repression of the human transcription factor achaete scute-like homologue 2 (ASCL2/Hash2). *Mol. Cell. Biol.* **25**, 6404-6414 (2005).
26. Zhang, J., Kalkum, M., Chait, B.T. & Roeder, R.G. The N-CoR-HDAC3 nuclear receptor corepressor complex inhibits the JNK pathway through the integral subunit GPS2. *Mol. Cell* **9**, 611-623 (2002).
27. Guenther, M.G. et al. A core SMRT corepressor complex containing HDAC3 and TBL1, a WD40-repeat protein linked to deafness. *Genes Dev.* **14**, 1048-1057 (2000).
28. Li, Y. et al. A novel histone deacetylase pathway regulates mitosis by modulating Aurora B kinase activity. *Genes Dev.* **20**, 2566-2579 (2006).
29. Yoon, H.G. et al. Purification and functional characterization of the human N-CoR complex: the roles of HDAC3, TBL1 and TBLR1. *EMBO J.* **22**, 1336-1346 (2003).
30. Yoon, H.G., Chan, D.W., Reynolds, A.B., Qin, J. & Wong, J. N-CoR mediates DNA methylation-dependent repression through a methyl CpG binding protein Kaiso. *Mol. Cell* **12**, 723-734 (2003).
31. Sif, S., Saurin, A.J., Imbalzano, A.N. & Kingston, R.E. Purification and characterization of mSin3A-containing Brg1 and hBrm chromatin remodeling complexes. *Genes Dev.* **15**, 603-618 (2001).
32. Underhill, C., Qutob, M.S., Yee, S.P. & Torchia, J. A novel nuclear receptor corepressor complex, N-CoR, contains components of the mammalian SWI/SNF complex and the corepressor KAP-1. *J. Biol. Chem.* **275**, 40463-40470 (2000).

33. Dellaire, G. et al. Mammalian PRP4 kinase copurifies and interacts with components of both the U5 snRNP and the N-CoR deacetylase complexes. *Mol. Cell. Biol.* **22**, 5141-5156 (2002).
34. Tahiliani, M. et al. The histone H3K4 demethylase SMCX links REST target genes to X-linked mental retardation. *Nature* **447**, 601-605 (2007).



## Supplementary S6 (table) Roles of classical HDACs and associated subunits in worm and fly development

| <b>Mammal</b> |                                | <b><i>C. elegans</i></b>       |                                                                                                                                                             | <b><i>Drosophila</i></b>                                             |                                                                                                                                                                                                                                                                                                             |                                                                                                      |
|---------------|--------------------------------|--------------------------------|-------------------------------------------------------------------------------------------------------------------------------------------------------------|----------------------------------------------------------------------|-------------------------------------------------------------------------------------------------------------------------------------------------------------------------------------------------------------------------------------------------------------------------------------------------------------|------------------------------------------------------------------------------------------------------|
| Deacetylase   | Associated subunit             | Protein name                   | Developmental role                                                                                                                                          | Protein name                                                         | Developmental role                                                                                                                                                                                                                                                                                          |                                                                                                      |
| HDAC1         |                                | Hda-1                          | One-fold stage <sup>1</sup><br>Vuval development <sup>3</sup><br>Gonogenesis <sup>5</sup><br>Cell migration <sup>7,8</sup><br>Axon pathfinding <sup>8</sup> | dRpd3/dHDAC1                                                         | Segmentation defects <sup>2</sup><br>G2-M cell cycle progression <sup>4</sup><br>Essential for S2 cell viability <sup>6</sup><br>Euchromatic transcriptional repression <sup>4,9</sup><br>Activating SMRTER expression <sup>4,9</sup><br>Homeotic gene expression <sup>10</sup> and longevity <sup>11</sup> |                                                                                                      |
|               | RbAp46/48<br>RbAp46/48<br>Sin3 | Rba-1<br>Rba-2/Lin-53<br>Sin-3 | One-fold stage arrest <sup>1</sup><br>Vulval development <sup>3,12</sup><br>Male sensory ray patterning <sup>13</sup>                                       | p55<br>p55<br>dSin3                                                  | Embryonic viability <sup>14</sup><br>Cell cycle progression <sup>4</sup><br>Activating SMRTER expression <sup>4</sup><br>Euchromatic transcriptional repression <sup>4,9</sup>                                                                                                                              |                                                                                                      |
|               | SAP18<br>Mi2                   | Let-48/Mi-2                    | Vulval development <sup>3,15</sup><br>Spatiotemporal cell differentiation <sup>17</sup>                                                                     | dSAP18<br>dMi2                                                       | Homeotic gene expression <sup>10</sup><br>Hox expression, larval and germ viability <sup>16</sup><br>Proneural gene expression <sup>18</sup>                                                                                                                                                                |                                                                                                      |
|               | p66<br>MTA1<br>MTA1            | ?<br>Egl-1/Lin-40<br>Egl-27    | Vulval development <sup>3,20</sup><br>Vulval development <sup>3,20</sup><br>Cell polarity and migration <sup>21</sup><br>Hox gene expression <sup>22</sup>  | dp66                                                                 | Wnt signaling <sup>19</sup>                                                                                                                                                                                                                                                                                 |                                                                                                      |
|               | CoREST                         | Spr-1                          | Inhibition of Notch signaling <sup>23</sup><br>Vulval morphogenesis <sup>24</sup><br>Gonal development <sup>24</sup>                                        |                                                                      |                                                                                                                                                                                                                                                                                                             |                                                                                                      |
|               | LSD1                           | Spr-5                          | Presenilin expression <sup>23,25</sup>                                                                                                                      | Su(VAR)3-3                                                           | Position-effect variegation modifier <sup>26,27</sup><br>Initiation of heterochromatin formation <sup>26</sup><br>Non-essential but important for viability <sup>27</sup><br>Sterility control and ovary development <sup>27</sup>                                                                          |                                                                                                      |
|               | HDAC3                          | N-CoR/SMRT                     | Hda-3                                                                                                                                                       | PolyQ toxicity <sup>28</sup>                                         | dHDAC3<br>SMRTER                                                                                                                                                                                                                                                                                            | Non-essential for S2 cell viability <sup>6</sup><br>Non-essential for S2 cell viability <sup>6</sup> |
|               | HDAC4                          |                                | Hda-4/-7                                                                                                                                                    | Non-essential <sup>29</sup><br>Chemoreceptor signaling <sup>30</sup> | dHDAC4                                                                                                                                                                                                                                                                                                      | Non-essential for S2 cell viability <sup>6</sup><br>Embryo segmentation <sup>31</sup>                |
|               | HDAC6<br>HDAC11                |                                | Hda-6<br>Hda-8                                                                                                                                              | ?<br>?                                                               | dHDAC6<br>dHDACX                                                                                                                                                                                                                                                                                            | Non-essential for S2 cell viability <sup>6</sup><br>Non-essential for S2 cell viability <sup>6</sup> |

---

Note: Those subject to gene inactivation analysis are listed here. Some of the deacetylases have also been analyzed in zebrafish. For example, the HDAC1 ortholog has been shown to play a role in neurogenesis<sup>32,33</sup>, oligodendrocyte differentiation<sup>34</sup>, neuron migration<sup>35</sup>, as well as formation of craniofacial cartilage and petoral fin<sup>36</sup>.

## References

1. Shi, Y. & Mello, C. A CBP/p300 homolog specifies multiple differentiation pathways in *Caenorhabditis elegans*. *Genes Dev.* **12**, 943-55 (1998).
2. Mannervik, M. & Levine, M. The Rpd3 histone deacetylase is required for segmentation of the *Drosophila* embryo. *Proc. Natl. Acad. Sci. USA* **96**, 6797-801 (1999).
3. Solari, F. & Ahringer, J. NURD-complex genes antagonise Ras-induced vulval development in *Caenorhabditis elegans*. *Curr. Biol.* **10**, 223-6 (2000).
4. Pile, L. A., Schlag, E. M. & Wassarman, D. A. The SIN3/RPD3 deacetylase complex is essential for G(2) phase cell cycle progression and regulation of SMRTER corepressor levels. *Mol. Cell. Biol.* **22**, 4965-76 (2002).
5. Dufourcq, P. et al. Functional requirement for histone deacetylase 1 in *Caenorhabditis elegans* gonadogenesis. *Mol. Cell. Biol.* **22**, 3024-34 (2002).
6. Foglietti, C. et al. Dissecting the biological functions of *Drosophila* histone deacetylases by RNA interference and transcriptional profiling. *J. Biol. Chem.* **281**, 17968-76 (2006).
7. Whetstine, J. R. et al. Regulation of tissue-specific and extracellular matrix-related genes by a class I histone deacetylase. *Mol. Cell* **18**, 483-90 (2005).
8. Zinovyeva, A. Y., Graham, S. M., Cloud, V. J. & Forrester, W. C. The *C. elegans* histone deacetylase HDA-1 is required for cell migration and axon pathfinding. *Dev. Biol.* **289**, 229-42 (2006).
9. Pile, L. A. & Wassarman, D. A. Chromosomal localization links the SIN3-RPD3 complex to the regulation of chromatin condensation, histone acetylation and gene expression. *EMBO J.* **19**, 6131-40 (2000).
10. Canudas, S. et al. dSAP18 and dHDAC1 contribute to the functional regulation of the *Drosophila* Fab-7 element. *Nucleic Acids Res.* **33**, 4857-64 (2005).
11. Rogina, B., Helfand, S. L. & Frankel, S. Longevity regulation by *Drosophila* Rpd3 deacetylase and caloric restriction. *Science* **298**, 1745 (2002).
12. Lu, X. & Horvitz, H. R. *lin-35* and *lin-53*, two genes that antagonize a *C. elegans* Ras pathway, encode proteins similar to Rb and its binding protein RbAp48. *Cell* **95**, 981-91 (1998).
13. Choy, S. W., Wong, Y. M., Ho, S. H. & Chow, K. L. *C. elegans* SIN-3 and its associated HDAC corepressor complex act as mediators of male sensory ray development. *Biochem. Biophys. Res. Commun.* **358**, 802-7 (2007).

14. Pannetta, G. & Pauli, D. The *Drosophila* Sin3 gene encodes a widely distributed transcription factor essential for embryonic viability. *Dev. Genes Evol.* **208**, 531-6 (1998).
15. von Zelewsky, T. et al. The *C. elegans* Mi-2 chromatin-remodelling proteins function in vulval cell fate determination. *Development* **127**, 5277-84 (2000).
16. Kehle, J. et al. dMi-2, a hunchback-interacting protein that functions in polycomb repression. *Science* **282**, 1897-900 (1998).
17. Unhavaithaya, Y. et al. MEP-1 and a homolog of the NURD complex component Mi-2 act together to maintain germline-soma distinctions in *C. elegans*. *Cell* **111**, 991-1002 (2002).
18. Yamasaki, Y. & Nishida, Y. Mi-2 chromatin remodeling factor functions in sensory organ development through proneural gene repression in *Drosophila*. *Dev. Growth Differ.* **48**, 411-8 (2006).
19. Kon, C., Cadigan, K. M., da Silva, S. L. & Nusse, R. Developmental roles of the Mi-2/NURD-associated protein p66 in *Drosophila*. *Genetics* **169**, 2087-100 (2005).
20. Solari, F., Bateman, A. & Ahringer, J. The *Caenorhabditis elegans* genes *egl-27* and *egr-1* are similar to MTA1, a member of a chromatin regulatory complex, and are redundantly required for embryonic patterning. *Development* **126**, 2483-94 (1999).
21. Herman, M. A. et al. EGL-27 is similar to a metastasis-associated factor and controls cell polarity and cell migration in *C. elegans*. *Development* **126**, 1055-64 (1999).
22. Ch'ng, Q. & Kenyon, C. *egl-27* generates anteroposterior patterns of cell fusion in *C. elegans* by regulating Hox gene expression and Hox protein function. *Development* **126**, 3303-12 (1999).
23. Jarriault, S. & Greenwald, I. Suppressors of the egg-laying defective phenotype of *sel-12* presenilin mutants implicate the CoREST corepressor complex in LIN-12/Notch signaling in *C. elegans*. *Genes Dev.* **16**, 2713-28 (2002).
24. Bender, A. M., Kirienko, N. V., Olson, S. K., Esko, J. D. & Fay, D. S. *lin-35/Rb* and the CoREST ortholog *spr-1* coordinately regulate vulval morphogenesis and gonad development in *C. elegans*. *Dev. Biol.* **302**, 448-62 (2007).
25. Eimer, S., Lakowski, B., Donhauser, R. & Baumeister, R. Loss of *spr-5* bypasses the requirement for the *C. elegans* presenilin *sel-12* by derepressing *hop-1*. *EMBO J.* **21**, 5787-96 (2002).
26. Rudolph, T. et al. Heterochromatin formation in *Drosophila* is initiated through active removal of H3K4 methylation by the LSD1 homolog SU(VAR)3-3. *Mol. Cell* **26**, 103-15 (2007).
27. Di Stefano, L., Ji, J. Y., Moon, N. S., Herr, A. & Dyson, N. Mutation of *Drosophila* *Lsd1* disrupts H3-K4 methylation, resulting in tissue-specific defects during development. *Curr. Biol.* **17**, 808-12 (2007).
28. Bates, E. A., Victor, M., Jones, A. K., Shi, Y. & Hart, A. C. Differential contributions of *Caenorhabditis elegans* histone deacetylases to huntingtin polyglutamine toxicity. *J. Neurosci.* **26**, 2830-8 (2006).
29. Choi, K. Y., Ji, Y. J., Jee, C., Kim, D. H. & Ahnn, J. Characterization of *CeHDA-7*, a class II histone deacetylase interacting with MEF-2 in *Caenorhabditis elegans*. *Biochem. Biophys. Res. Commun.* **293**, 1295-300 (2002).

30. van der Linden, A. M., Nolan, K. M. & Sengupta, P. KIN-29 SIK regulates chemoreceptor gene expression via an MEF2 transcription factor and a class II HDAC. *EMBO J.* **26**, 358-70 (2007).
31. Zeremski, M., Stricker, J. R., Fischer, D., Zusman, S. B. & Cohen, D. Histone deacetylase dHDAC4 is involved in segmentation of the *Drosophila* embryo and is regulated by gap and pair-rule genes. *Genesis* **35**, 31-8 (2003).
32. Cunliffe, V. T. Histone deacetylase 1 is required to repress Notch target gene expression during zebrafish neurogenesis and to maintain the production of motoneurons in response to hedgehog signalling. *Development* **131**, 2983-95 (2004).
33. Yamaguchi, M. et al. Histone deacetylase 1 regulates retinal neurogenesis in zebrafish by suppressing Wnt and Notch signaling pathways. *Development* **132**, 3027-43 (2005).
34. Cunliffe, V. T. & Casaccia-Bonnel, P. Histone deacetylase 1 is essential for oligodendrocyte specification in the zebrafish CNS. *Mech. Dev.* **123**, 24-30 (2006).
35. Nambiar, R. M., Ignatius, M. S. & Henion, P. D. Zebrafish colgate/hdac1 functions in the non-canonical Wnt pathway during axial extension and in Wnt-independent branchiomotor neuron migration. *Mech. Dev.* (2007).
36. Pillai, R., Coverdale, L. E., Dubey, G. & Martin, C. C. Histone deacetylase 1 (HDAC-1) required for the normal formation of craniofacial cartilage and pectoral fins of the zebrafish. *Dev Dyn* **231**, 647-54 (2004).
